# Supplementary material for: Potential impacts of finfish aquaculture on eelgrass (Zostera marina) beds and possible monitoring metrics for management: a case study in Atlantic Canada
Source: PeerJ. 2018 Oct 5;6:e5630. doi: 10.7717/peerj.5630 (PMC6174869; doi:10.7717/peerj.5630)
Supplement: Supplemental Information 1 [file peerj-06-5630-s001.xlsx]

## Sheet: Eelgrass, Environ, TOTALinfauna
		ENVIRONMENTAL VARIABLES				EELGRASS TISSUE (AG = aboveground, BG = belowground)						EELGRASS STRUCTURE					INFAUNA
Site	SITE ID	MPB Chl-a (g/mg)	Sediment Organic (%)	%Annual Algae	%Hydoids	%N AG	%N BG	d13C AG	d15N AG	d13C BG	d15N BG	Shoot Density (m-2)	Canopy Height (cm)	% Eelgrass Cover	AG Biomass (DW g m-2)	BG Biomass (DW g m-2)	Total Biomass (WW g m-2)	Total Abundance (m-2)	Species Richness
Carters Beach	CB150715C1	1.19	1.1	50	0	1.46	0.93	-13.14	6.19	-13.14	6.68	100	19	40	95.54	163.69	3.18	31.85	1
Carters Beach	CB150715C2	0.56	1.3	32	0	1.55	0.78	-12.76	6.83	-12.5	6.35	44	28	45	4.14	13.69	0	0	0
Carters Beach	CB150715C3	1.1	1.2	35	0	1.57	0.84	-12.17	6.26	-12.22	6.32	68	27	10	83.76	130.51	1.34	31.85	1
Carters Beach	CB150715C4	1.1	1.3	10	0	1.49	0.78	-12.34	6.21	-11.83	5.67	152	35	75	109.55	192.04	26.18	191.08	5
Carters Beach	CB150715C5	1.34	1	50	0	1.85	0.81	-10.97	6.01	-11.38	6.4	140	39	95	124.2	219.75	6.27	191.08	4
Carters Beach	CB150715C6	1.3	1.3	60	0	1.52	0.87	-11.64	6.04	-12.22	6.49	68	22	60	85.35	63.38	15.51	95.54	3
Croucher Isalnd	CR110713C1	na	na	14	0	na	na	na	na	na	na	460	35	100	166.1	939.07	60.83	63.69	2
Croucher Isalnd	CR110713C2	na	na	31	0	na	na	na	na	na	na	308	55	100	180.49	639.23	25.02	95.54	2
Croucher Isalnd	CR110713C3	na	na	10	0	na	na	na	na	na	na	456	42	100	280.66	1069.09	0	0	0
Croucher Isalnd	CR110713C4	na	na	22	0	na	na	na	na	na	na	288	25	100	316.1	813.42	9.24	31.85	1
Croucher Isalnd	CR110713C5	na	na	5	0	na	na	na	na	na	na	352	39	100	155.97	561.29	20.3	222.93	6
Croucher Isalnd	CR110713C6	na	na	7	0	na	na	na	na	na	na	184	38	100	96.39	331.72	0	0	0
Franks George Island	FG310713C1	1.37053	4.45356	57	0	1.16	0.92	-9.7	4.69	-10.54	3.95	120	58	95	351.88	278.33	6.37	63.69	1
Franks George Island	FG310713C2	0.859709	2.19313	60	0	1.26	0.91	-10.92	4.78	-11.83	3.7	44	69	80	314.74	257.28	2.17	31.85	1
Franks George Island	FG310713C3	1.24465	3.98494	35	0	1.56	0.87	-10.25	5.28	-10.84	4.31	52	55	60	313.98	168.74	1.97	31.85	1
Franks George Island	FG310713C4	1.19661	3.30291	30	0	1.36	1.02	-10	4.56	-12.1	3.7	160	65	95	209.54	187.9	225.79	127.39	4
Franks George Island	FG310713C5	1.00487	2.58405	44	0	1.29	0.85	-10.29	4.52	-11.91	4.09	96	65	100	404.64	143.34	7.32	31.85	1
Franks George Island	FG310713C6	0.515828	3.30372	50	0	1.32	0.79	-8.91	5.05	-11.07	3.68	68	73	90	340.92	235.31	2.55	31.85	1
False Passage	FP290713C1	2.77009	1.78851	1	1	2.07	0.43	-8.3	8.05	-8.52	6.44	164	40	100	627.09	139.26	48.69	127.39	3
False Passage	FP290713C2	0.365822	1.10266	5	0	1.56	0.69	-10.33	6.84	-10.35	5.86	48	37	60	9.1	12.36	109.46	382.17	5
False Passage	FP290713C3	0.277441	1.78084	2	0	1.22	0.63	-10.63	5.67	-10.86	5.85	132	71	100	375.12	134.96	144.75	541.4	7
False Passage	FP290713C4	0.287279	1.3123	2	0	1.52	0.77	-8.8	5.71	-8.94	5.1	20	30	5	0	0	142.28	127.39	4
False Passage	FP290713C5	0.339614	0.815152	0	0	1.45	0.76	-10.63	6.6	-12.69	5.65	176	39	100	66.24	95.99	36.59	191.08	3
False Passage	FP290713C6	0.3915	1.35989	2	0	1.5	0.56	-10.62	5.91	-10.1	6.14	200	61	100	371.45	3.67	6.05	127.39	3
Green Bay	GB190715C1	0.607724	3.6	0	5	1.22	0.72	-10.5	5.26	-11.49	4.31	168	45	100	275.48	362.42	12.74	286.62	1
Green Bay	GB190715C2	0.807321	5.8	0	10	1.13	0.76	-10.69	4.57	-11.69	3.7	148	59	100	242.04	391.72	15.92	159.24	1
Green Bay	GB190715C3	0.699702	6.7	0	5	1.05	0.84	-9.76	3.87	-11.64	4.15	120	40	80	70.38	380.89	28.06	159.24	3
Green Bay	GB190715C4	0.858668	4.2	0	5	1.17	1.14	-10.57	5.08	-9.89	5	220	49	100	191.08	420.06	12.29	191.08	2
Green Bay	GB190715C5	0.673975	5.2	0	10	0.96	0.63	-11.68	4.7	-11.48	4.79	148	53	95	114.97	310.51	124.2	159.24	3
Green Bay	GB190715C6	0.50649	4.6	0	2	1.23	0.69	-9.9	4.94	-11.39	4.75	200	50	100	168.15	373.89	25.48	31.85	1
Old Warf	OW180715C1	1.23	1.8	0	5	1.49	0.73	-9.74	5.15	-11.58	4.43	100	72	100	292.36	279.3	50.67	286.62	2
Old Warf	OW180715C2	1.06	1.4	0	2	1.48	0.95	-10.4	5.13	-11.44	5.07	136	39	70	140.13	527.07	19.11	414.01	3
Old Warf	OW180715C3	0.97	2.4	0	0	1.47	0.99	-10.01	3.81	-12.06	4.22	196	74	100	79.3	415.61	38.22	254.78	2
Old Warf	OW180715C4	1.17	2.1	0	0	na	na	na	na	na	na	0	0	0	0	0	12.74	127.39	1
Old Warf	OW180715C5	0.88	1.9	0	10	1.59	0.82	-9.5	4.29	-11.52	4.42	212	47	85	149.36	335.99	66.88	414.01	3
Old Warf	OW180715C6	0.74	2.9	0	2	1.56	0.95	-10.07	3.45	-11.32	3.31	172	41	0	226.11	197.13	6.37	63.69	1
Port Joli	PJ160715C1	0.64	1.6	0	0	1.52	0.95	-10.45	6.71	-11.1	6.48	76	68	70	300	377.71	12.74	127.39	2
Port Joli	PJ160715C2	0.91	1.1	10	0	1.22	0.64	-9.38	6.41	-10.43	6.56	72	55	45	256.05	239.49	105.1	318.47	4
Port Joli	PJ160715C3	0.7	1.3	0	0	1.02	0.7	-8.3	6.19	-10.67	5.46	64	70	50	9.87	0.24	0	0	0
Port Joli	PJ160715C4	0.75	1.5	0	2	1.4	0.83	-11.01	5.58	-11.8	5.2	232	38	100	228.03	410.51	15.92	318.47	3
Port Joli	PJ160715C5	0.66	1.6	0	0	1.24	0.95	-9.21	6.51	-10.44	6.6	88	53	100	579.94	560.51	461.78	382.17	5
Port Joli	PJ160715C6	0.62	1.5	0	0	1.32	0.83	-10.03	6.11	-11.4	6.22	168	16	75	189.81	282.17	287.14	445.86	5
Spectacle Island	SI170715C1	1.03	5.1	0	1	na	na	na	na	na	na	0	0	0	0	0	6.37	95.54	1
Spectacle Island	SI170715C2	0.76	2.8	0	2	1.73	0.9	-8.95	3.33	-11.6	2.68	76	43	40	69.75	44.27	22.29	95.54	1
Spectacle Island	SI170715C3	0.85	1.4	0	10	1.4	0.87	-10.46	4.35	-13.5	3.67	128	65	100	181.21	166.56	3.18	31.85	1
Spectacle Island	SI170715C4	0.67	5.8	0	35	1.53	0.86	-9.24	3.59	-11.7	3.3	56	57	55	121.97	71.66	12.99	95.54	3
Spectacle Island	SI170715C5	1.52	3.1	0	10	1.22	0.89	-9.68	5.27	-13.57	5.5	100	66	80	95.86	241.08	15.19	159.24	4
Spectacle Island	SI170715C6	1.36	3.4	0	2	1.33	0.73	-9.28	5.26	-11.37	4.79	84	54	45	98.73	206.37	105.1	700.64	4
Inner Sambro Island	SM260613C1	na	na	1	1	na	na	na	na	na	na	108	45	80	218.21	371.91	85.35	318.47	2
Inner Sambro Island	SM260613C2	na	na	3	0	na	na	na	na	na	na	156	45	90	163.16	192.34	285.35	318.47	6
Inner Sambro Island	SM260613C3	na	na	0	0	na	na	na	na	na	na	96	60	95	185.86	935.5	72.32	318.47	5
Inner Sambro Island	SM260613C4	na	na	10	0	na	na	na	na	na	na	160	32	100	127.89	493.1	34.39	127.39	3
Inner Sambro Island	SM260613C5	na	na	2	0	na	na	na	na	na	na	0	0	0	318.68	532.22	71.97	159.24	2
Inner Sambro Island	SM260613C6	na	na	5	0	na	na	na	na	na	na	168	62	100	156.5	310.86	141.18	286.62	4
Strawberry Island	ST110713C1	na	na	0	0	na	na	na	na	na	na	120	31	40	58.23	239.78	36.12	95.54	3
Strawberry Island	ST110713C2	na	na	4	0	na	na	na	na	na	na	172	20	90	95.14	488.06	161.46	191.08	5
Strawberry Island	ST110713C3	na	na	10	0	na	na	na	na	na	na	296	24	95	58.27	326.39	205.09	127.39	2
Strawberry Island	ST110713C4	na	na	8	0	na	na	na	na	na	na	80	32	75	43.58	188.93	207.01	159.24	5
Strawberry Island	ST110713C5	na	na	4	0	na	na	na	na	na	na	92	22	90	55.06	296.62	263.37	222.93	3
Strawberry Island	ST110713C6	na	na	11	0	na	na	na	na	na	na	280	22	100	41.27	177.16	17.48	63.69	2
Taylor Head Provincial Park	TH300713C1	0.475957	1.63819	25	0	1.22	0.86	-10.58	6.43	-11.54	5.94	128	95	100	638.97	230.8	44.59	127.39	3
Taylor Head Provincial Park	TH300713C2	1.73228	1.39389	30	0	1.25	0.82	-11.2	6.75	-11.81	5.72	36	81	80	467.54	260.85	8.6	95.54	2
Taylor Head Provincial Park	TH300713C3	0.840213	1.22239	0	2	1.38	0.81	-10.32	6.51	-11.19	6.12	68	78	95	418.69	414.77	40.13	95.54	1
Taylor Head Provincial Park	TH300713C4	0.847222	1.77694	20	0	0.77	0.86	-10.66	5.42	-11.54	5.94	124	62	90	138.98	55.51	3.5	31.85	1
Taylor Head Provincial Park	TH300713C5	0.370286	2.44206	15	0	1.01	0.79	-11	6.63	-11.93	6.15	120	79	80	203.19	207.3	41.4	191.08	2
Taylor Head Provincial Park	TH300713C6	2.30086	1.35569	40	0	1.68	1	-9.71	6.83	-11.21	5.77	24	85	5	135.37	105.71	32.8	191.08	2

## Sheet: Infauna Abundance
		Species abundance (m-2)
Site	Site ID	Alitta virens	Amphipod	Amphitrite figulus	Aphiopholis aculeata	Arabella iricolor	Asychis elongata	Capitella capitata	Cerastoderma pinnulatum	Cerebratulus sp.	Clymenella torquata	Corophium volutator	Cyclocardia borealis	Drilonereis sp.	Dysponetus pygmaeis	Ensis directus	Glycera sp.	Harmothae imbricata	Hiatella arctica	Lineus ruber	Lumbrineris sp.	Macoma sp.	Melampus bidentatus	Mytilus edulis	Nassarius trivittatus	Nephtys sp.	Nereis sp.	Ophelia sp.	Oysponetus pygmaeus	Pectinaria gouldii	Petricola pholadiformis	Pherusa affinis	Platynereis dumerilii	Polychaete	Saccoglossus kowalevskii	Solemya borealis	Tellina agilis
Carters Beach	CB150715C1	0	0	0	0	0	0	0	0	0	0	0	0	0	0	0	31.847	0	0	0	0	0	0	0	0	0	0	0	0	0	0	0	0	0	0	0	0
Carters Beach	CB150715C2	0	0	0	0	0	0	0	0	0	0	0	0	0	0	0	0	0	0	0	0	0	0	0	0	0	0	0	0	0	0	0	0	0	0	0	0
Carters Beach	CB150715C3	0	0	0	0	0	0	0	0	0	0	31.847	0	0	0	0	0	0	0	0	0	0	0	0	0	0	0	0	0	0	0	0	0	0	0	0	0
Carters Beach	CB150715C4	0	0	0	0	0	0	0	31.847	0	31.847	0	0	0	0	0	0	0	31.847	0	0	0	0	0	0	31.847	0	0	0	0	0	0	0	0	0	0	63.694
Carters Beach	CB150715C5	0	0	0	0	0	0	0	31.847	0	0	0	0	95.541	0	0	0	31.847	0	0	0	31.847	0	0	0	0	0	0	0	0	0	0	0	0	0	0	0
Carters Beach	CB150715C6	0	0	0	0	0	0	0	31.847	0	0	0	0	0	0	0	0	0	0	0	0	0	0	0	0	31.847	0	0	0	0	0	0	0	0	0	0	31.847
Croucher Isalnd	CR170713C1	0	0	0	0	0	0	0	0	0	0	0	0	31.8471	0	0	31.8471	0	0	0	0	0	0	0	0	0	0	0	0	0	0	0	0	0	0	0	0
Croucher Isalnd	CR170713C2	0	0	0	31.8471	0	0	0	0	0	0	0	0	0	0	0	63.6943	0	0	0	0	0	0	0	0	0	0	0	0	0	0	0	0	0	0	0	0
Croucher Isalnd	CR170713C3	0	0	0	0	0	0	0	0	0	0	0	0	0	0	0	0	0	0	0	0	0	0	0	0	0	0	0	0	0	0	0	0	31.8471	0	0	0
Croucher Isalnd	CR170713C4	0	0	0	0	0	0	0	0	0	31.8471	0	0	0	0	0	0	0	0	0	0	0	0	0	0	0	0	0	0	0	0	0	0	0	0	0	0
Croucher Isalnd	CR170713C5	0	0	0	0	0	0	0	31.8471	0	0	63.6943	0	0	31.8471	0	0	0	0	0	0	0	0	0	31.8471	0	0	0	0	0	31.8471	0	0	0	0	0	31.8471
Franks George Island	FG310713C1	0	0	0	0	0	0	0	0	0	0	0	0	0	0	0	0	0	0	0	0	0	0	0	63.6943	0	0	0	0	0	0	0	0	0	0	0	0
Franks George Island	FG310713C2	0	0	0	0	0	0	0	0	0	31.8471	0	0	0	0	0	0	0	0	0	0	0	0	0	0	0	0	0	0	0	0	0	0	0	0	0	0
Franks George Island	FG310713C3	0	0	0	0	0	0	0	0	0	31.8471	0	0	0	0	0	0	0	0	0	0	0	0	0	0	0	0	0	0	0	0	0	0	0	0	0	0
Franks George Island	FG310713C4	0	0	0	0	0	0	0	0	31.8471	31.8471	0	0	0	0	0	0	0	0	0	31.8471	0	0	0	0	31.8471	0	0	0	0	0	0	0	0	0	0	0
Franks George Island	FG310713C5	0	0	0	0	0	0	0	0	0	0	0	0	0	0	0	31.8471	0	0	0	0	0	0	0	0	0	0	0	0	0	0	0	0	0	0	0	0
Franks George Island	FG310713C6	0	0	0	0	0	0	0	0	0	0	0	0	0	0	0	0	0	0	0	0	0	0	0	0	31.8471	0	0	0	0	0	0	0	0	0	0	0
False Passage	FP290713C1	0	0	0	0	0	0	0	0	0	31.8471	0	0	0	0	0	0	0	0	0	63.6943	0	0	0	0	31.8471	0	0	0	0	0	0	0	0	0	0	0
False Passage	FP290713C2	0	0	0	0	0	0	0	0	31.8471	63.6943	0	0	0	0	0	0	0	0	0	0	191.083	0	0	0	63.6943	0	0	0	0	0	0	0	0	0	31.8471	0
False Passage	FP290713C3	0	0	0	0	0	0	0	0	0	191.083	31.8471	0	0	0	0	0	0	0	0	95.5414	31.8471	0	0	31.8471	95.5414	0	0	0	0	0	63.6943	0	0	0	0	0
False Passage	FP290713C4	0	0	0	0	0	0	0	0	0	0	0	0	31.8471	0	0	31.8471	0	0	0	0	31.8471	0	0	0	0	0	0	0	0	0	31.8471	0	0	0	0	0
False Passage	FP290713C5	0	0	0	0	0	0	0	0	0	63.6943	0	0	0	0	0	0	0	0	0	0	31.8471	0	0	0	95.5414	0	0	0	0	0	0	0	0	0	0	0
False Passage	FP290713C6	0	31.8471	0	0	0	0	0	0	0	31.8471	0	0	0	0	0	0	0	0	0	0	0	0	0	0	0	0	0	0	0	0	0	0	0	0	0	63.6943
Green Bay	GB190715C1	0	0	0	0	0	0	0	0	0	286.62	0	0	0	0	0	0	0	0	0	0	0	0	0	0	0	0	0	0	0	0	0	0	0	0	0	0
Green Bay	GB190715C2	0	0	0	0	0	0	0	0	0	159.24	0	0	0	0	0	0	0	0	0	0	0	0	0	0	0	0	0	0	0	0	0	0	0	0	0	0
Green Bay	GB190715C3	0	0	0	0	0	0	0	0	0	95.541	0	0	0	0	0	31.847	0	0	0	0	0	0	0	0	31.847	0	0	0	0	0	0	0	0	0	0	0
Green Bay	GB190715C4	0	0	0	0	0	0	0	0	0	127.39	63.694	0	0	0	0	0	0	0	0	0	0	0	0	0	0	0	0	0	0	0	0	0	0	0	0	0
Green Bay	GB190715C5	0	0	0	0	31.847	0	0	0	0	95.541	0	0	0	0	0	0	0	0	0	0	0	0	0	0	0	31.847	0	0	0	0	0	0	0	0	0	0
Green Bay	GB190715C6	0	0	0	0	0	0	0	0	0	0	0	0	0	0	0	0	0	0	0	0	0	0	0	0	0	0	0	0	0	0	31.847	0	0	0	0	0
Old Warf	OW180715C1	0	0	0	0	0	0	0	0	0	254.78	0	0	0	0	0	0	0	0	0	0	0	0	0	0	31.847	0	0	0	0	0	0	0	0	0	0	0
Old Warf	OW180715C2	0	0	0	0	0	0	31.847	0	0	318.47	0	0	0	0	0	0	0	0	0	0	0	0	0	0	63.694	0	0	0	0	0	0	0	0	0	0	0
Old Warf	OW180715C3	0	0	0	0	0	0	0	0	0	222.93	0	0	0	0	0	0	0	0	0	0	0	0	0	0	31.847	0	0	0	0	0	0	0	0	0	0	0
Old Warf	OW180715C4	0	0	0	0	0	0	0	0	0	0	0	0	0	0	0	0	0	0	0	0	0	0	0	0	127.39	0	0	0	0	0	0	0	0	0	0	0
Old Warf	OW180715C5	0	0	0	0	0	0	31.847	0	0	286.62	0	0	0	0	0	0	0	0	0	0	0	0	0	0	95.541	0	0	0	0	0	0	0	0	0	0	0
Old Warf	OW180715C6	0	0	0	0	0	0	0	0	0	0	0	0	0	0	0	0	0	0	0	0	0	0	0	0	63.694	0	0	0	0	0	0	0	0	0	0	0
Port Joli	PJ160715C1	0	0	0	0	0	0	0	0	0	95.541	0	0	0	0	0	0	0	0	0	0	0	0	0	0	0	0	0	0	0	0	0	0	0	31.847	0	0
Port Joli	PJ160715C2	0	0	0	0	0	0	0	0	0	159.24	0	0	63.694	0	0	31.847	0	0	0	0	0	0	0	0	0	0	0	0	0	0	63.694	0	0	0	0	0
Port Joli	PJ160715C3	0	0	0	0	0	0	0	0	0	0	0	0	0	0	0	0	0	0	0	0	0	0	0	0	0	0	0	0	0	0	0	0	0	0	0	0
Port Joli	PJ160715C4	0	0	0	0	0	0	0	0	0	191.08	0	0	0	0	0	0	0	0	0	0	0	0	0	0	31.847	0	95.541	0	0	0	0	0	0	0	0	0
Port Joli	PJ160715C5	0	0	127.39	0	0	0	0	0	0	127.39	0	0	0	0	0	0	0	0	0	0	0	0	0	0	63.694	0	31.847	0	31.847	0	0	0	0	0	0	0
Port Joli	PJ160715C6	0	0	63.694	0	0	0	0	0	0	286.62	31.847	0	0	0	0	0	31.847	0	0	0	0	0	0	0	0	0	0	0	0	0	0	0	0	31.847	0	0
Spectacle Island	SI170715C1	0	0	0	0	0	0	0	0	0	0	0	0	0	0	0	0	0	0	0	0	0	0	0	0	95.541	0	0	0	0	0	0	0	0	0	0	0
Spectacle Island	SI170715C2	0	0	0	0	0	0	0	0	0	0	0	0	0	0	0	0	0	0	0	0	0	0	0	0	0	95.541	0	0	0	0	0	0	0	0	0	0
Spectacle Island	SI170715C3	0	0	0	0	0	0	0	0	0	0	0	0	0	0	0	0	0	0	31.847	0	0	0	0	0	0	0	0	0	0	0	0	0	0	0	0	0
Spectacle Island	SI170715C4	0	0	0	0	0	0	31.847	0	0	31.847	0	0	0	0	0	0	0	0	0	0	0	0	0	0	31.847	0	0	0	0	0	0	0	0	0	0	0
Spectacle Island	SI170715C5	0	0	0	0	0	0	63.694	0	0	31.847	0	0	0	0	0	0	0	0	0	31.847	0	0	0	0	0	0	0	0	0	0	0	0	0	0	0	31.847
Spectacle Island	SI170715C6	0	0	0	0	63.694	0	63.694	0	0	509.55	0	0	0	0	0	0	0	0	0	0	0	0	0	0	63.694	0	0	0	0	0	0	0	0	0	0	0
Inner Sambro Island	SM120713C1	0	0	0	0	0	0	0	0	0	159.236	0	0	0	0	0	0	0	0	0	0	0	0	0	0	159.236	0	0	0	0	0	0	0	0	0	0	0
Inner Sambro Island	SM120713C2	31.8471	0	0	0	0	0	0	0	0	159.236	0	0	0	0	0	31.8471	0	0	0	0	0	0	0	0	31.8471	31.8471	0	0	0	0	0	31.8471	0	0	0	0
Inner Sambro Island	SM120713C3	0	0	0	0	0	63.6943	0	0	0	95.5414	0	0	0	0	0	0	0	0	0	0	0	95.5414	0	0	31.8471	0	0	0	0	0	31.8471	0	0	0	0	0
Inner Sambro Island	SM120713C4	31.8471	0	0	0	0	0	0	0	0	63.6943	0	0	0	0	0	0	0	0	0	0	0	0	0	0	0	0	0	0	0	0	0	0	0	0	0	31.8471
Inner Sambro Island	SM120713C5	0	0	0	0	0	0	0	0	0	0	0	0	0	0	0	0	0	0	0	0	0	0	0	0	127.389	0	0	0	0	0	31.8471	0	0	0	0	0
Inner Sambro Island	SM120713C6	0	0	0	0	0	0	0	0	0	127.389	0	31.8471	0	0	0	0	0	0	0	0	0	0	0	0	63.6943	63.6943	0	0	0	0	0	0	0	0	0	0
Strawberry Island	ST110713C1	0	0	0	0	0	0	0	0	0	0	0	0	31.8471	0	0	31.8471	0	0	0	0	0	0	0	31.8471	0	0	0	0	0	0	0	0	0	0	0	0
Strawberry Island	ST110713C2	0	0	0	0	0	0	0	0	0	31.8471	0	0	0	0	0	63.6943	0	0	0	0	0	0	31.8471	0	0	0	0	31.8471	0	0	31.8471	0	0	0	0	0
Strawberry Island	ST110713C3	0	0	0	0	0	0	0	0	0	0	0	0	95.5414	0	31.8471	0	0	0	0	0	0	0	0	0	0	0	0	0	0	0	0	0	0	0	0	0
Strawberry Island	ST110713C4	0	0	0	0	0	0	0	31.8471	0	0	0	0	31.8471	0	0	31.8471	0	0	0	0	0	0	31.8471	31.8471	0	0	0	0	0	0	0	0	0	0	0	0
Strawberry Island	ST110713C5	0	0	31.8471	0	0	0	0	0	0	0	0	0	159.236	0	0	0	0	0	0	0	0	0	31.8471	0	0	0	0	0	0	0	0	0	0	0	0	0
Strawberry Island	ST110713C6	0	0	0	0	0	0	0	0	0	0	0	0	31.8471	0	0	31.8471	0	0	0	0	0	0	0	0	0	0	0	0	0	0	0	0	0	0	0	0
Taylor Head Provincial Park	TH300713C1	0	0	0	0	0	0	0	0	0	63.6943	0	0	0	0	0	31.8471	0	0	0	0	0	0	0	0	0	0	0	0	0	0	31.8471	0	0	0	0	0
Taylor Head Provincial Park	TH300713C2	0	0	0	0	0	0	0	0	0	63.6943	0	0	0	0	0	0	0	0	0	0	0	0	0	0	31.8471	0	0	0	0	0	0	0	0	0	0	0
Taylor Head Provincial Park	TH300713C3	0	0	0	0	0	0	0	0	0	0	0	0	0	0	0	0	0	0	0	0	0	0	0	0	95.5414	0	0	0	0	0	0	0	0	0	0	0
Taylor Head Provincial Park	TH300713C4	0	0	0	0	0	0	0	0	0	31.8471	0	0	0	0	0	0	0	0	0	0	0	0	0	0	0	0	0	0	0	0	0	0	0	0	0	0
Taylor Head Provincial Park	TH300713C5	0	0	0	0	0	0	0	0	0	95.5414	0	0	0	0	0	0	0	0	0	0	0	0	0	0	95.5414	0	0	0	0	0	0	0	0	0	0	0
Taylor Head Provincial Park	TH300713C6	0	0	0	0	0	0	0	0	0	127.389	0	0	0	0	0	0	0	0	0	0	0	0	0	0	63.6943	0	0	0	0	0	0	0	0	0	0	0

## Sheet: Infauna Biomass
		Species biomass (WW g m-2)
Site	Site ID	Alitta virens	Amphipod	Amphitrite figulus	Aphiopholis aculeata	Arabella iricolor	Asychis elongata	Capitella capitata	Cerastoderma pinnulatum	Cerebratulus sp.	Clymenella torquata	Corophium volutator	Cyclocardia borealis	Drilonereis sp.	Dysponetus pygmaeis	Ensis directus	Glycera sp.	Harmothae imbricata	Hiatella arctica	Lineus ruber	Lumbrineris sp.	Macoma sp.	Melampus bidentatus	Mytilus edulis	Nassarius trivittatus	Nephtys sp.	Nereis sp.	Ophelia sp.	Oysponetus pygmaeus	Pectinaria gouldii	Petricola pholadiformis	Pherusa affinis	Platynereis dumerilii	Polychaete	Saccoglossus kowalevskii	Solemya borealis	Tellina agilis
Carters Beach	CB150715C1	0	0	0	0	0	0	0	0	0	0	0	0	0	0	0	3.1847	0	0	0	0	0	0	0	0	0	0	0	0	0	0	0	0	0	0	0	0
Carters Beach	CB150715C2	0	0	0	0	0	0	0	0	0	0	0	0	0	0	0	0	0	0	0	0	0	0	0	0	0	0	0	0	0	0	0	0	0	0	0	0
Carters Beach	CB150715C3	0	0	0	0	0	0	0	0	0	0	1.3376	0	0	0	0	0	0	0	0	0	0	0	0	0	0	0	0	0	0	0	0	0	0	0	0	0
Carters Beach	CB150715C4	0	0	0	0	0	0	0	1.2739	0	15.924	0	0	0	0	0	0	0	1.3057	0	0	0	0	0	0	6.3694	0	0	0	0	0	0	0	0	0	0	1.3057
Carters Beach	CB150715C5	0	0	0	0	0	0	0	1.242	0	0	0	0	2.4841	0	0	0	1.879	0	0	0	0.66879	0	0	0	0	0	0	0	0	0	0	0	0	0	0	0
Carters Beach	CB150715C6	0	0	0	0	0	0	0	1.7197	0	0	0	0	0	0	0	0	0	0	0	0	0	0	0	0	12.7389	0	0	0	0	0	0	0	0	0	0	1.051
Croucher Isalnd	CR170713C1	0	0	0	0	0	0	0	0	0	0	0	0	14.968	0	0	45.86	0	0	0	0	0	0	0	0	0	0	0	0	0	0	0	0	0	0	0	0
Croucher Isalnd	CR170713C2	0	0	0	0.49363	0	0	0	0	0	0	0	0	0	0	0	24.522	0	0	0	0	0	0	0	0	0	0	0	0	0	0	0	0	0	0	0	0
Croucher Isalnd	CR170713C3	0	0	0	0	0	0	0	0	0	0	0	0	0	0	0	0	0	0	0	0	0	0	0	0	0	0	0	0	0	0	0	0	42.675	0	0	0
Croucher Isalnd	CR170713C4	0	0	0	0	0	0	0	0	0	9.2357	0	0	0	0	0	0	0	0	0	0	0	0	0	0	0	0	0	0	0	0	0	0	0	0	0	0
Croucher Isalnd	CR170713C5	0	0	0	0	0	0	0	0.20701	0	0	2.7707	0	0	13.822	0	0	0	0	0	0	0	0	0	0	0	0	0	0	0	2.1465	0	0	0	0	0	1.3535
Franks George Island	FG310713C1	0	0	0	0	0	0	0	0	0	0	0	0	0	0	0	0	0	0	0	0	0	0	0	6.3694	0	0	0	0	0	0	0	0	0	0	0	0
Franks George Island	FG310713C2	0	0	0	0	0	0	0	0	0	2.1656	0	0	0	0	0	0	0	0	0	0	0	0	0	0	0	0	0	0	0	0	0	0	0	0	0	0
Franks George Island	FG310713C3	0	0	0	0	0	0	0	0	0	1.9745	0	0	0	0	0	0	0	0	0	0	0	0	0	0	0	0	0	0	0	0	0	0	0	0	0	0
Franks George Island	FG310713C4	0	0	0	0	0	0	0	0	52.548	64.013	0	0	0	0	0	0	0	0	0	105.09	0	0	0	0	4.1401	0	0	0	0	0	0	0	0	0	0	0
Franks George Island	FG310713C5	0	0	0	0	0	0	0	0	0	0	0	0	0	0	0	7.3248	0	0	0	0	0	0	0	0	0	0	0	0	0	0	0	0	0	0	0	0
Franks George Island	FG310713C6		0	0	0	0	0	0	0	0	0	0	0	0	0	0	0	0	0	0	0	0	0	0	0	2.5478	0	0	0	0	0	0	0		0	0	0
False Passage	FP290713C1	0	0	0	0	0	0	0	0	0	0.92357	0	0	0	0	0	0	0	0	0	35.032	0	0	0	0	12.739	0	0	0	0	0	0	0	0	0	0	0
False Passage	FP290713C2	0	0	0	0	0	0	0	0	1.1783	6.3694	0	0	0	0	0	0	0	0	0	0	15.924	0	0	0	22.293	0	0	0	0	0	0	0	0	0	63.694	0
False Passage	FP290713C3	0	0	0	0	0	0	0	0	0	15.924	1.6242	0	0	0	0	0	0	0	0	25.478	2.3567	0	0	16.561	9.5541	0	0	0	0	0	73.248	0	0	0	0	0
False Passage	FP290713C4	0	0	0	0	0	0	0	0	0	0	0	0	0.63694	0	0	111.46	0	0	0	0	1.5254	0	0	0	0	0	0	0	0	0	28.662	0	0	0	0	0
False Passage	FP290713C5	0	0	0	0	0	0	0	0	0	19.108	0	0	0	0	0	0	0	0	0	0	1.5573	0	0	0	15.924	0	0	0	0	0	0	0	0	0	0	0
False Passage	FP290713C6	0	1.6879	0	0	0	0	0	0	0	3.1847	0	0	0	0	0	0	0	0	0	0	0	0	0	0	0	0	0	0	0	0	0	0	0	0	0	1.1783
Green Bay	GB190715C1	0	0	0	0	0	0	0	0	0	12.739	0	0	0	0	0	0	0	0	0	0	0	0	0	0	0	0	0	0	0	0	0	0	0	0	0	0
Green Bay	GB190715C2	0	0	0	0	0	0	0	0	0	15.924	0	0	0	0	0	0	0	0	0	0	0	0	0	0	0	0	0	0	0	0	0	0	0	0	0	0
Green Bay	GB190715C3	0	0	0	0	0	0	0	0	0	3.1847	0	0	0	0	0	22.293	0	0	0	0	0	0	0	0	2.5796	0	0	0	0	0	0	0	0	0	0	0
Green Bay	GB190715C4	0	0	0	0	0	0	0	0	0	9.5541	2.7389	0	0	0	0	0	0	0	0	0	0	0	0	0	0	0	0	0	0	0	0	0	0	0	0	0
Green Bay	GB190715C5	0	0	0	0	15.924	0	0	0	0	9.5541	0	0	0	0	0	0	0	0	0	0	0	0	0	0	0	98.726	0	0	0	0	0	0	0	0	0	0
Green Bay	GB190715C6	0	0	0	0	0	0	0	0	0	0	0	0	0	0	0	0	0	0	0	0	0	0	0	0	0	0	0	0	0	0	25.478	0	0	0	0	0
Old Warf	OW180715C1	0	0	0	0	0	0	0	0	0	47.771	0	0	0	0	0	0	0	0	0	0	0	0	0	0	2.8981	0	0	0	0	0	0	0	0	0	0	0
Old Warf	OW180715C2	0	0	0	0	0	0	3.1847	0	0	9.5541	0	0	0	0	0	0	0	0	0	0	0	0	0	0	6.3694	0	0	0	0	0	0	0	0	0	0	0
Old Warf	OW180715C3	0	0	0	0	0	0	0	0	0	12.7389	0	0	0	0	0	0	0	0	0	0	0	0	0	0	25.478	0	0	0	0	0	0	0	0	0	0	0
Old Warf	OW180715C4	0	0	0	0	0	0	0	0	0	0	0	0	0	0	0	0	0	0	0	0	0	0	0	0	12.739	0	0	0	0	0	0	0	0	0	0	0
Old Warf	OW180715C5	0	0	0	0	0	0	22.293	0	0	28.662	0	0	0	0	0	0	0	0	0	0	0	0	0	0	15.924	0	0	0	0	0	0	0	0	0	0	0
Old Warf	OW180715C6	0	0	0	0	0	0	0	0	0	0	0	0	0	0	0	0	0	0	0	0	0	0	0	0	6.3694	0	0	0	0	0	0	0	0	0	0	0
Port Joli	PJ160715C1	0	0	0	0	0	0	0	0	0	9.554	0	0	0	0	0	0	0	0	0	0	0	0	0	0	0	0	0	0	0	0	0	0	0	3.1847	0	0
Port Joli	PJ160715C2	0	0	0	0	0	0	0	0	0	9.554	0	0	12.739	0	0	28.662	0	0	0	0	0	0	0	0	0	0	0	0	0	0	54.14	0	0	0	0	0
Port Joli	PJ160715C3	0	0	0	0	0	0	0	0	0	0	0	0	0	0	0	0	0	0	0	0	0	0	0	0	0	0	0	0	0	0	0	0	0	0	0	0
Port Joli	PJ160715C4	0	0	0	0	0	0	0	0	0	6.3694	0	0	0	0	0	0	0	0	0	0	0	0	0	0	3.1847	0	6.3694	0	0	0	0	0	0	0	0	0
Port Joli	PJ160715C5	0	0	366.24	0	0	0	0	0	0	35.032	0	0	0	0	0	0	0	0	0	0	0	0	0	0	25.478	0	31.847	0	3.1847	0	0	0	0	0	0	0
Port Joli	PJ160715C6	0	0	267.52	0	0	0	0	0	0	12.739	1.465	0	0	0	0	0	3.1847	0	0	0	0	0	0	0	0	0	0	0	0	0	0	0	0	2.2293	0	0
Spectacle Island	SI170715C1	0	0	0	0	0	0	0	0	0	0	0	0	0	0	0	0	0	0	0	0	0	0	0	0	6.3694	0	0	0	0	0	0	0	0	0	0	0
Spectacle Island	SI170715C2	0	0	0	0	0	0	0	0	0	0	0	0	0	0	0	0	0	0	0	0	0	0	0	0	0	22.293	0	0	0	0	0	0	0	0	0	0
Spectacle Island	SI170715C3	0	0	0	0	0	0	0	0	0	0	0	0	0	0	0	0	0	0	3.1847	0	0	0	0	0	0	0	0	0	0	0	0	0	0	0	0	0
Spectacle Island	SI170715C4	0	0	0	0	0	0	9.5541	0	0	0.35032	0	0	0	0	0	0	0	0	0	0	0	0	0	0	3.0892	0	0	0	0	0	0	0	0	0	0	0
Spectacle Island	SI170715C5	0	0	0	0	0	0	9.5541	0	0	1.051	0	0	0	0	0	0	0	0	0	3.1847	0	0	0	0	0	0	0	0	0	0	0	0	0	0	0	1.4013
Spectacle Island	SI170715C6	0	0	0	0	3.1847	0	12.739	0	0	82.803	0	0	0	0	0	0	0	0	0	0	0	0	0	0	6.3694	0	0	0	0	0	0	0	0	0	0	0
Inner Sambro Island	SM120713C1	0	0	0	0	0	0	0	0	0	31.847	0	0	0	0	0	0	0	0	0	0	0	0	0	0	53.503	0	0	0	0	0	0	0	0	0	0	0
Inner Sambro Island	SM120713C2	11.146	0	0	0	0	0	0	0	0	29.936	0	0	0	0	0	41.401	0	0	0	0	0	0	0	0	27.707	101.273	0	0	0	0	0	85.032	0	0	0	0
Inner Sambro Island	SM120713C3	0	0	0	0	0	23.567	0	0	0	33.439	0	0	0	0	0	0	0	0	0	0	0	0.98408	0	0	1.2739	0	0	0	0	0	13.057	0	0	0	0	0
Inner Sambro Island	SM120713C4	22.293	0	0	0	0	0	0	0	0	9.2357	0	0	0	0	0	0	0	0	0	0	0	0	0	0	0	22.293	0	0	0	0	0	0	0	0	0	2.8662
Inner Sambro Island	SM120713C5	0	0	0	0	0	0	0	0	0	0	0	0	0	0	0	0	0	0	0	0	0	0	0	0	32.484	0	0	0	0	0	39.49	0	0	0	0	0
Inner Sambro Island	SM120713C6	0	0	0	0	0	0	0	0	0	16.879	0	30.35	0	0	0	0	0	0	0	0	0	0	0	0	4.4586	89.49	0	0	0	0	0	0	0	0	0	0
Strawberry Island	ST110713C1	0	0	0	0	0	0	0	0	0	0	0	0	12.675	0	0	21.561	0	0	0	0	0	0	0	1.879	0	0	0	0	0	0	0	0	0	0	0	0
Strawberry Island	ST110713C2	0	0	0	0	0	0	0	0	0	2.4841	0	0	0	0	0	12.866	0	0	0	0	0	0	90.446	0	0	0	0	5.6688	0	0	50	0	0	0	0	0
Strawberry Island	ST110713C3	0	0	0	0	0	0	0	0	0	0	0	0	14.013	0	191.08	0	0	0	0	0	0	0	0	0	0	0	0	0	0	0	0	0	0	0	0	0
Strawberry Island	ST110713C4	0	0	0	0	0	0	0	2.8662	0	0	0	0	25.478	0	0	92.357	0	0	0	0	0	0	82.803	3.5032	0	0	0	0	0	0	0	0	0	0	0	0
Strawberry Island	ST110713C5	0	0	57.006	0	0	0	0	0	0	0	0	0	94.904	0	0	0	0	0	0	0	0	0	111.46	0	0	0	0	0	0	0	0	0	0	0	0	0
Strawberry Island	ST110713C6	0	0	0	0	0	0	0	0	0	0	0	0	2.5159	0	0	14.968	0	0	0	0	0	0	0	0	0	0	0	0	0	0	0	0	0	0	0	0
Taylor Head Provincial Park	TH300713C1	0	0	0	0	0	0	0	0	0	12.102	0	0	0	0	0	5.414	0	0	0	0	0	0	0	0	0	0	0	0	0	0	27.07	0	0	0	0	0
Taylor Head Provincial Park	TH300713C2	0	0	0	0	0	0	0	0	0	4.1401	0	0	0	0	0	0	0	0	0	0	0	0	0	0	4.4586	0	0	0	0	0	0	0	0	0	0	0
Taylor Head Provincial Park	TH300713C3	0	0	0	0	0	0	0	0	0	0	0	0	0	0	0	0	0	0	0	0	0	0	0	0	40.127	0	0	0	0	0	0	0	0	0	0	0
Taylor Head Provincial Park	TH300713C4	0	0	0	0	0	0	0	0	0	3.5032	0	0	0	0	0	0	0	0	0	0	0	0	0	0	0	0	0	0	0	0	0	0	0	0	0	0
Taylor Head Provincial Park	TH300713C5	0	0	0	0	0	0	0	0	0	10.191	0	0	0	0	0	0	0	0	0	0	0	0	0	0	31.21	0	0	0	0	0	0	0	0	0	0	0
Taylor Head Provincial Park	TH300713C6	0	0	0	0	0	0	0	0	0	17.197	0	0	0	0	0	0	0	0	0	0	0	0	0	0	15.605	0	0	0	0	0	0	0	0	0	0	0
